# Supplementary material
Source: publisher figshare collection journal article supplement (https://frontiersin.figshare.com/ndownloader/files/25668479)
Supplement: Supplementary file [file 25668479]

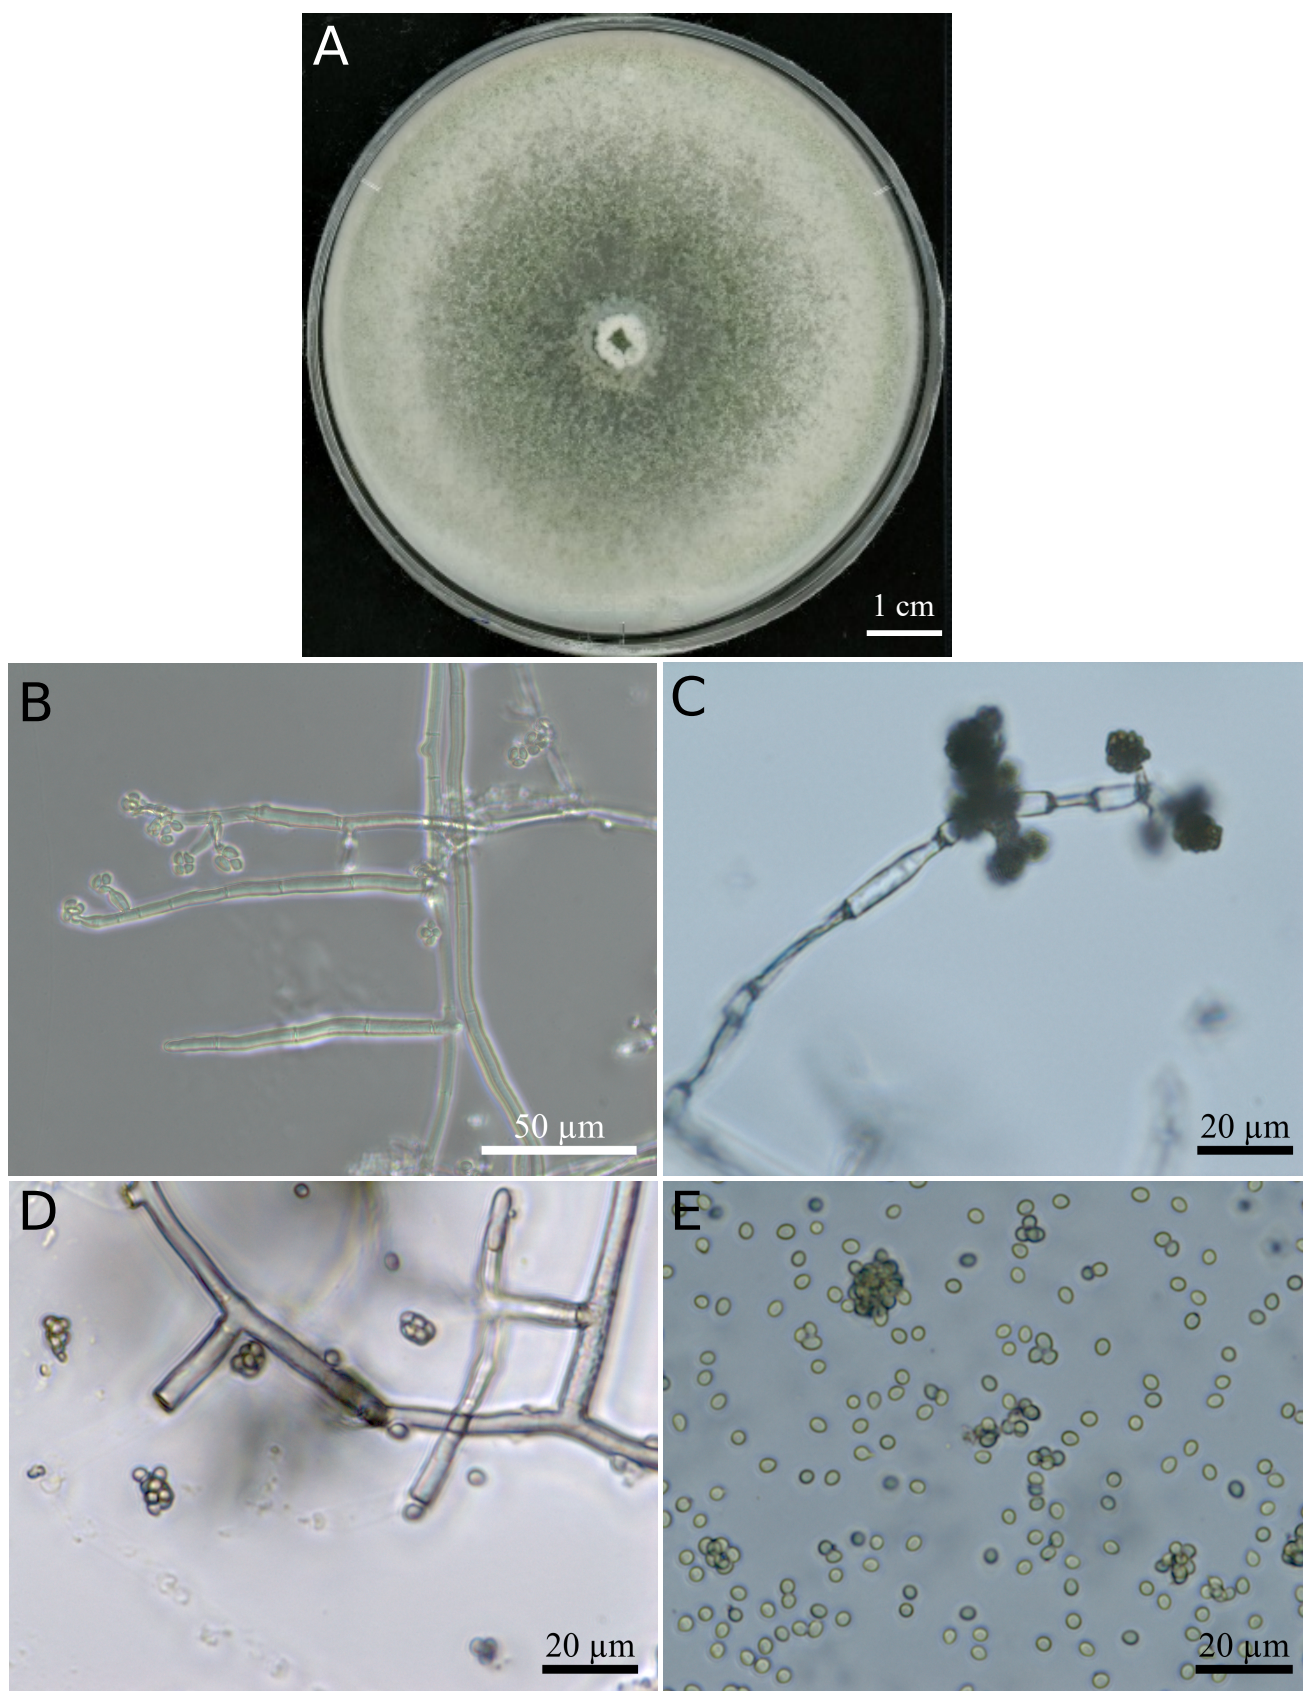

**Supplementary Figure 1.** Morphology of the new *Trichoderma* strain. (A): The strain on KM plates after 4 days. (B) - (D): Developing conidia 3 (B) and 7 (C - D) days after incubation. (E): Released conidia.
